# Supplementary material for: Spatial Control of Functional Response in 4D-Printed Active Metallic Structures
Source: PubMed Central journal article supplement (PMC5399446; doi:10.1038/srep46707), 2017-04-21
Supplement: srep46707-s1.pdf [file srep46707-s1.pdf]

Supplementary information for:

## Spatial Control of Functional Response in 4D-Printed Active Metallic Structures

Ji Ma<sup>1,\*</sup>, Brian Franco<sup>1</sup>, Gustavo Tapia<sup>2</sup>, Kubra Karayagiz<sup>1</sup>, Luke Johnson<sup>1</sup>, Jun Liu<sup>1</sup>, Raymundo Arroyave<sup>1</sup>, Ibrahim Karaman<sup>1</sup>, Alaa Elwany<sup>2</sup>

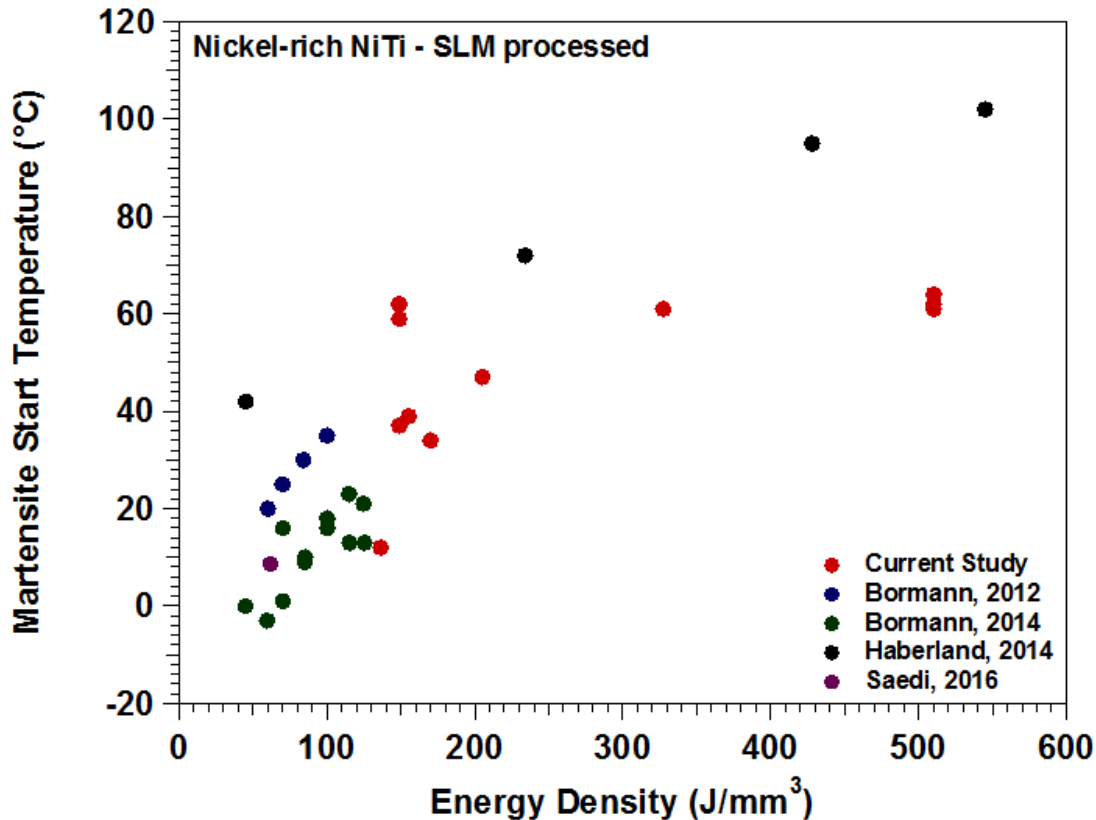

**Figure S1:** Summary of the effect of energy density on the martensite start temperatures of nickel-rich (50.7-50.9% Ni) Ni-Ti shape memory alloy fabricated using the selective laser melting process.

### References for Figure:

- [Bormann, 2012] Bormann T, Schumacher R, Mueller B, Mertmann M, de Wild M, Müller B. *Journal of Materials Engineering and Performance*, **21**, 2519-2524 (2012).
- [Bormann, 2014] Bormann T, Mueller B, Schinhammer M, Kessler A, Thalmann P, Müller B, de Wild M. *Materials Characterization* 94, 189-202 (2014).
- [Haberland, 2014] Haberland C, Elahinia M, Walker JM, Meier H, Frenzel J. *Smart Materials and Structures* 23, 104002 (2014).
- [Saedi, 2016] Saedi S, Turabi AS, Andani MT, Haberland C, Elahinia M, Karaca H. *Smart materials and structures*, 25, 035005 (2016).

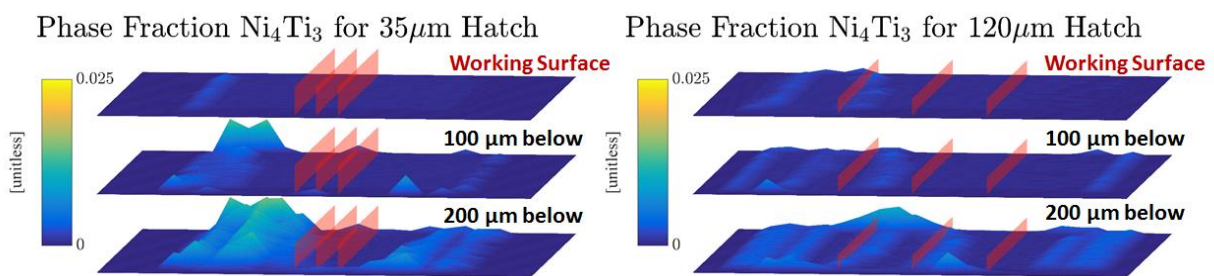

**Figure S2:** Simulated volume fraction of the  $\text{Ni}_4\text{Ti}_3$  precipitates at various depths beneath the working surface as a result of three laser scan tracks as indicated: significant precipitation formation begins at roughly 100  $\mu\text{m}$ , or 3 build layers beneath the surface. At this depth, the sample is reheated to a sufficiently high temperature to allow precipitate formation and growth, but not too high where melting occurs. A larger volume fraction of precipitates is found in the 35  $\mu\text{m}$  hatch distance case compared to the 120  $\mu\text{m}$  hatch distance sample because the closer proximity of the laser tracks allows for a prolonged exposure at temperatures where precipitation could occur.

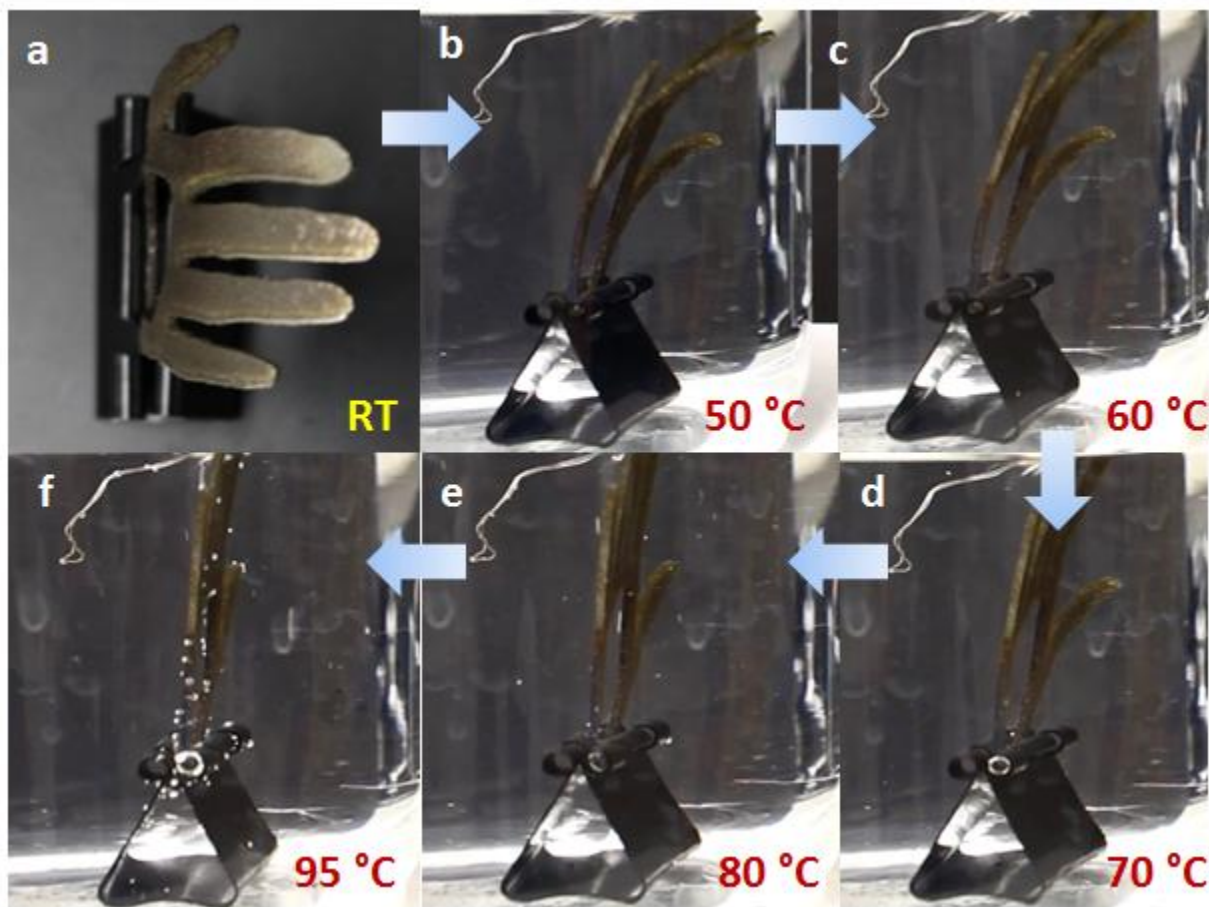

**Figure S3:** Using the techniques developed to control the location dependent properties, complex active components with multiple locations showing distinct functional response can be created. This example shows a hand shape made from Ni-rich NiTi shape memory alloy where each individual finger has a distinct transformation temperature, and thus activates shape recovery at different times during heating.
